# Supplementary material for: Sacituzumab govitecan plus platinum-based chemotherapy mediates significant antitumor effects in triple-negative breast, urinary bladder, and small-cell lung carcinomas
Source: Oncotarget. 2024 Feb 22;15:144–58. doi: 10.18632/oncotarget.28559 (PMC10883684; doi:10.18632/oncotarget.28559)
Supplement: Supplementary file 1 [file oncotarget-15-28559-s001.pdf]

# Sacituzumab govitecan plus platinum-based chemotherapy mediates significant antitumor effects in triple-negative breast, urinary bladder, and small-cell lung carcinomas

## SUPPLEMENTARY MATERIALS

### Assessment of Trop-2 expression on cell lines

Expression of Trop-2 on the cell surface is based on flow cytometry. Briefly, cells were harvested with Accutase Cell Detachment Solution (Becton Dickinson (BD), Franklin Lakes, NJ; Cat. No. 561527) and assayed for Trop-2 expression using QuantiBRITE PE beads (BD Cat. No. 340495) and a PE-conjugated anti-Trop-2 antibody (eBiosciences, Cat. No. 12-6024) following the manufactures' instructions. Data were acquired on a FACSCalibur Flow Cytometer (BD) with CellQuest Pro software. Staining was analyzed with Flowjo software (Tree Star, Ashland OR).

### *In vitro* combination cytotoxicity assays

*In vitro* cytotoxicity was determined using the 3-(4,5-dimethylthiazol-2-yl)-5-(3-carboxymethoxyphenyl)-2-(4-sulfophenyl)-2H-tetrazolium dye reduction assay (MTS dye reduction assay; Promega, Madison, WI). Briefly, cells were plated into 96-well clear, flat-bottomed plates overnight. Dose-response curves for each agent alone were first tested to determine single agent  $IC_{10}$ -,  $IC_{20}$ -, or  $IC_{30}$ -values after 96-h incubation. In combination assays, one agent (e.g., SG) is tested on a given cell line across a range of concentrations (i.e., dose-response curves) either alone or in the presence of a constant amount ( $IC_{10}$ -,  $IC_{20}$ -, or  $IC_{30}$ -concentration) of the second agent (e.g., carboplatin). This is then reversed in which the chemotherapeutic was plated across a concentration range either alone or with a constant amount of SG (i.e.,  $IC_{10}$ -,  $IC_{20}$ -, or  $IC_{30}$ -concentration). Growth inhibition was measured as a percent of growth relative to untreated cells. Dose/response curves were generated from the mean of triplicate determinations, and  $IC_{50}$ -values were calculated using Prism GraphPad Software package (v6.05; Advanced Graphics Software, Inc.; Encinitas, CA). For each condition, the  $IC_{50}$ -value was determined from these data. These  $IC_{50}$ -values are then normalized and plotted as isobolograms or used to calculate combinatorial Index (CI) numbers.

CI were calculated using the following formula:

$$CI = Da/Dxa + Db/Dxb [1],$$

where,

Da =  $IC_{50}$  of SG when used in combination with a constant amount of a given chemotherapeutic ( $IC_{10}$ ,  $IC_{20}$ , or  $IC_{30}$  concentration);

Db =  $IC_{50}$  of chemotherapeutic when used in combination with a constant amount of SG ( $IC_{10}$ ,  $IC_{20}$ , or  $IC_{30}$  concentration);

Dxa =  $IC_{50}$  of SG when used alone; and

Dxb =  $IC_{50}$  of chemotherapeutic when used alone.

(Antagonistic Effect CI >1.0, Additive Effect CI = 1.0, Synergistic Effect CI <1.0).

### Immunoblot assessment of SG- and chemotherapy-mediated cell signaling *in vitro*

Cells (HCC1806, DMS 53, 5637, and RT4) were plated overnight in 6-well plates. The following day, SG, a chemotherapeutic (carboplatin or cisplatin), or the combination of SG and a chemotherapeutic were added to appropriate wells for 24 h. Concentrations for each agent is shown in the figure. Cells were harvested, lysed in Ripa buffer containing protease/phosphatase inhibitor cocktail (Cell Signaling Technology, Danvers, MA, USA) and protein concentrations were determined using BCA Protein Assay Kit (Thermo Fisher; Grand Island, NY, USA). A total of 20 mg protein was resolved in 4–12% Bis-Tris NuPAGE gels (Thermo Fisher Scientific; Cat. No. NP0322) and transferred to polyvinylidene difluoride (PVDF) membranes. Blots were blocked with 5% nonfat milk in 1x TBS-T for 1 h at room temperature. Membranes were probed overnight at 4°C with primary antibody, followed by 1 h incubation at room temperature with secondary antibody. Rabbit anti-human primary antibodies were purchased from Cell Signaling Technology and included anti-p21<sup>waf1/cip1</sup> (Cat. No. 2947s), anti-Cyclin D1 (Cat. No. 4967s), anti-Mcl-1 (Cat. No. D35A5), anti-survivin (Cat. No. 2803s) and anti-β-actin (Cat. No. 4967). Murine anti-human primary antibodies were purchased from Santa Cruz Biotechnology, Inc. (Dallas, TX, USA) and included anti-Bcl-2 (Cat. No. sc-7382) and anti-Bax (Cat. No. sc-20067). Horseradish peroxidase-conjugated secondary antibodies against rabbit (Cat. No. 7074s) and murine (Cat. No. 7076s) primary antibodies were purchased (Santa Cruz Biotechnology, Inc.). Thermo Fisher Scientific SuperSignal West Dura Extended Duration Substrate (Cat. No. F00041) was used for detection.

## ***In vivo* therapeutic studies**

All animal studies were approved by Montclair State University Institutional Animal Care and Use Committee (Montclair, NJ). Mice set up with HCC1806 or 5637 tumor xenografts utilized 5-week old NCr female athymic nude (*nu/nu*) mice (Taconic Farms, Germantown, NY). Xenografts were established by harvesting cells from tissue culture and mixing 1:1 with matrigel, such that each mouse received a total of  $1 \times 10^7$  cells s.c. in the right flank. For the DMS 53 xenografts, 5-week-old female C.B.-17 SCID mice (Taconic Farms) were utilized to establish tumors in their right flank. Mice were injected s.c. with 200  $\mu$ L of DMS 53 tumor suspension (20% w/v) plus cells ( $5 \times 10^6$  cells per mouse) mixed 1:1 with matrigel. Tumor volume (TV) was determined by measurements in two dimensions using calipers, with volumes defined as:  $L \times w^2/2$ , where  $L$  is the longest

dimension of the tumor and  $w$  the shortest. Mice were randomized into treatment groups and therapy begun when tumor volumes were approximately 0.3 cm<sup>3</sup>. Treatment regimens, dosages, and number of animals in each experiment are described in the *Results* and in the Figure Legends. The lyophilized SG and control ADC (h679-CL2A-SN-38) were reconstituted and diluted as required in sterile saline. Likewise, all chemotherapeutics were diluted in sterile saline to achieve desired concentrations prior to administration to animals.

## **SUPPLEMENTARY REFERENCES**

1. Reynolds CP, Maurer BJ. Evaluating response to antineoplastic drug combinations in tissue culture models. *Methods Mol Med.* 2005; 110:173–83. <https://doi.org/10.1385/1-59259-869-2:173>. [PubMed]

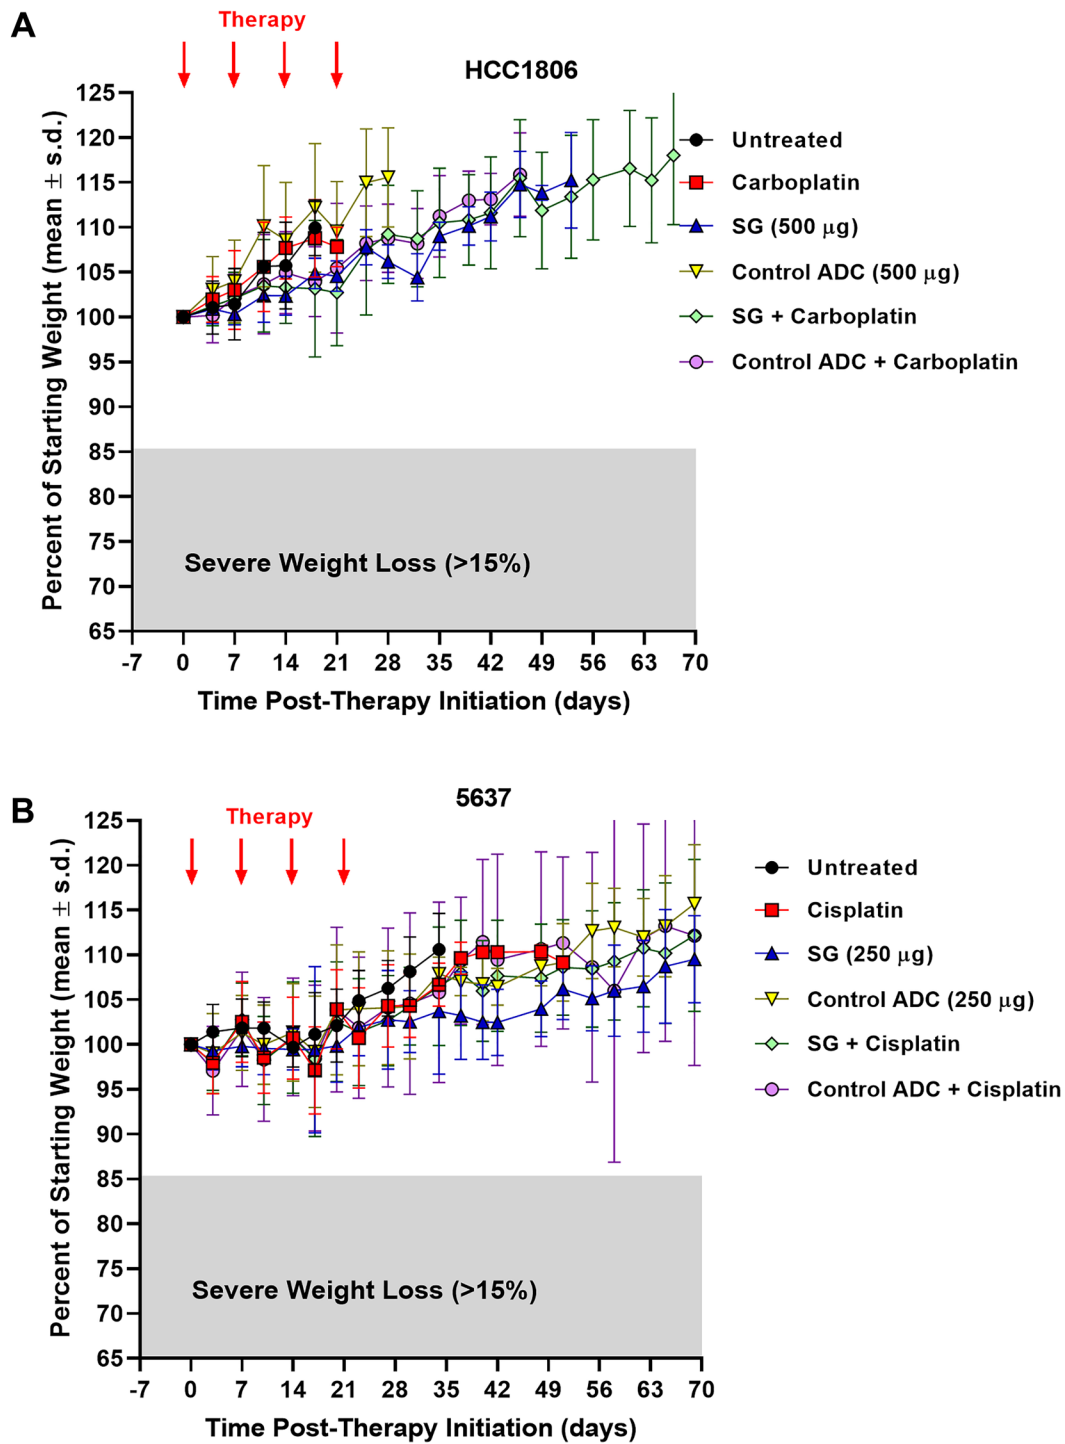

**Supplementary Figure 1: Tolerability of SG combined with carboplatin or cisplatin in mice bearing human TNBC and UBC xenografts.** Toxicity was assessed by changes in body weight in the animals treated with SG plus various combinations of (A) carboplatin in HCC1806 TNBC tumor-bearing mice, or (B) cisplatin in 5637 UBC tumor-bearing animals. Shaded area indicates weight loss greater than 15% (i.e., weight drop to 85% or lower of starting weight).

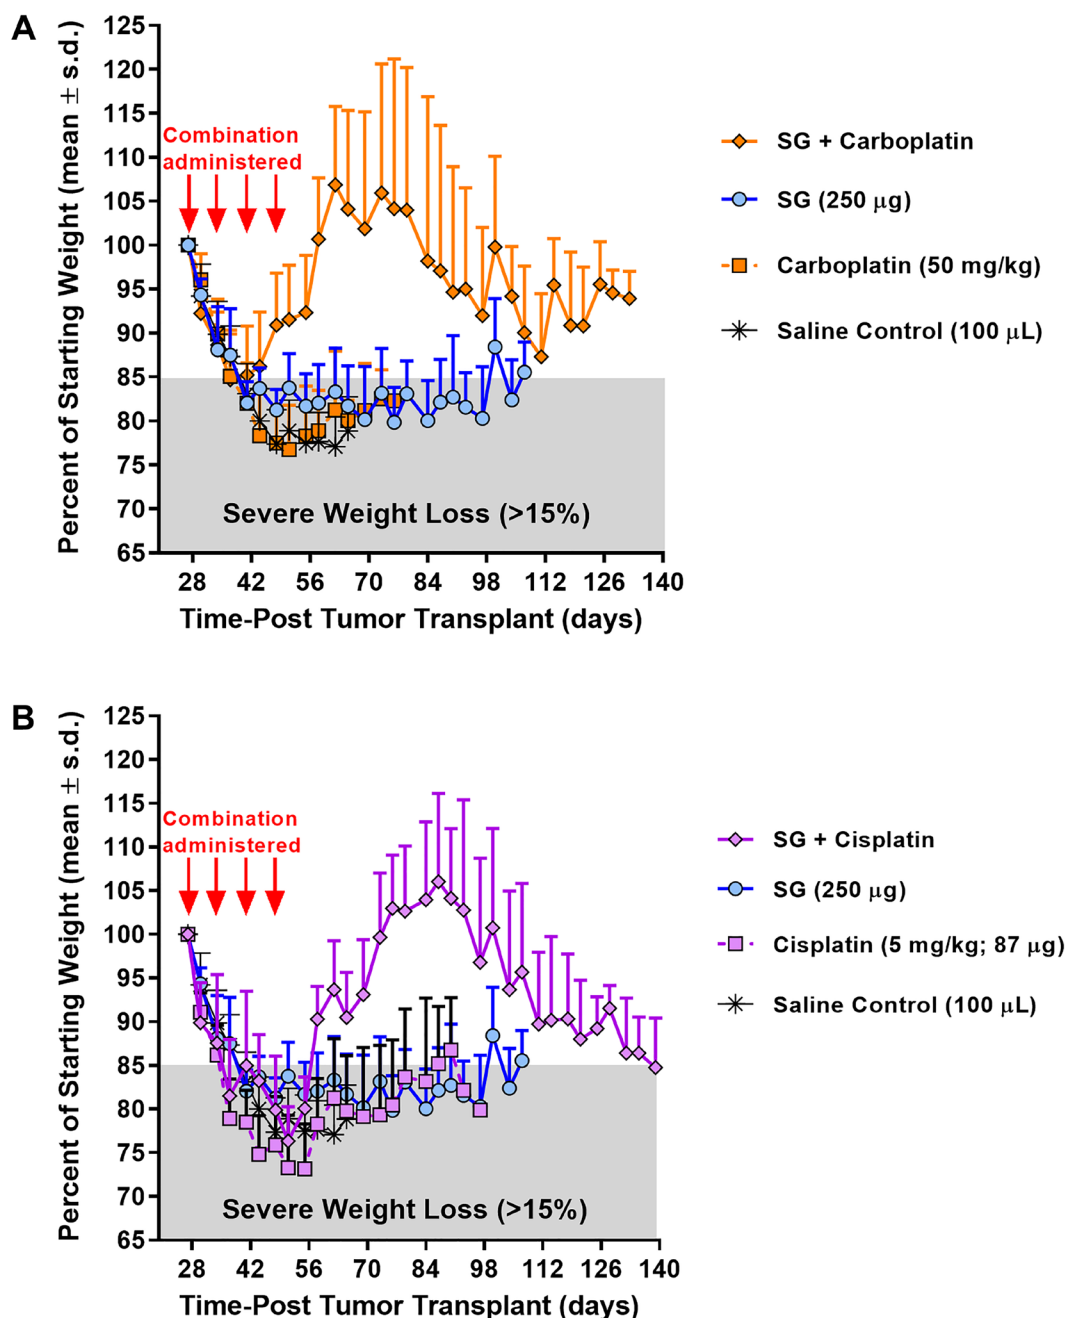

**Supplementary Figure 2: Combination of SG plus carboplatin or cisplatin in mice bearing DMS 53 tumor-xenografts reverses cachexia.** Animals were set up with DMS 53 tumor xenografts as described in Materials and Methods. Mice were treated with SG, carboplatin, cisplatin, or combinations at the indicated doses. Animals were weighed twice weekly and changes in whole body weights relative to the time the mice received their first treatment was calculated with 100% representing this starting weight. Since some mice were lost due to disease progression over time, the graphed data represents all surviving mice within a treatment group at the various time-points. (A) Tumor-bearing mice treated with the combination of SG plus carboplatin. (B) Mice treated with SG plus cisplatin. The red arrows in both graphs represented the days when the combination therapy was administered to the animals. As these data were from a single study, the SG monotherapy and saline control graphs are from the same mice in both (A) and (B). Separate graphs for carboplatin and cisplatin combinations with SG are presented for clarity.

**Supplementary Table 1: Trop-2 surface expression levels in various solid tumor lines via FACS analysis\***

| Cell line               | Tumor type                                   | Surface Trop-2 Molecules per cell (Mean $\pm$ s.d.) |
|-------------------------|----------------------------------------------|-----------------------------------------------------|
| RT4                     | Urinary Bladder; Transitional Cell Papilloma | 354,641 $\pm$ 36,904                                |
| 5637                    | Urinary Bladder; Grade II Carcinoma          | 161,765 $\pm$ 6,014                                 |
| T24                     | Urinary Bladder; Transitional Cell Carcinoma | 78,206 $\pm$ 19,463                                 |
| UM-UC-3                 | Urinary Bladder; Carcinoma                   | 2,198 $\pm$ 921                                     |
| DMS 53 <sup>1</sup>     | Small Cell Lung Carcinoma                    | 43,620 $\pm$ 4,557                                  |
| Raji (negative control) | NHL                                          | 766 $\pm$ 35                                        |

\*Three separate assays were performed on each cell line. <sup>1</sup>Results based on two separate assays. Abbreviation: s.d.: standard deviation.

**Supplementary Table 2: Area under the curve comparisons between SG plus platinum-based chemotherapeutics versus controls in mice bearing various human tumor xenografts**

| Disease (cell line) | Combination                                  | Control Treatment                   | Time of Comparison <sup>a</sup> | Tumor Volumes <sup>b</sup> (cm <sup>3</sup> ) (mean $\pm$ s.d.) | P-value <sup>c</sup> | P-value <sup>d</sup> (AUC) |
|---------------------|----------------------------------------------|-------------------------------------|---------------------------------|-----------------------------------------------------------------|----------------------|----------------------------|
| TNBC (HCC1806)      | SG (500 $\mu$ g) <i>plus</i> Carboplatin vs. | SG (500 $\mu$ g)                    | day 42                          | 0.129 $\pm$ 0.034 vs. 0.765 $\pm$ 0.295                         | 0.0005               | 0.0006                     |
|                     |                                              | Control ADC (500 $\mu$ g)           | day 18                          | 0.157 $\pm$ 0.023 vs. 0.801 $\pm$ 0.253                         | 0.0002               | 0.0003                     |
|                     |                                              | Carboplatin                         | day 7                           | 0.245 $\pm$ 0.069 vs. 0.610 $\pm$ 0.287                         | 0.0082               | 0.0062                     |
|                     |                                              | Control ADC <i>plus</i> Carboplatin | day 42                          | 0.129 $\pm$ 0.034 vs. 0.881 $\pm$ 0.193                         | <0.0001              | <0.0001                    |
|                     |                                              | Saline                              | day 11                          | 0.229 $\pm$ 0.043 vs. 0.844 $\pm$ 0.322                         | 0.0011               | 0.0001                     |
| TNBC (HCC1806)      | SG (250 $\mu$ g) <i>plus</i> Carboplatin vs. | SG (250 $\mu$ g)                    | day 28                          | 0.236 $\pm$ 0.126 vs. 0.738 $\pm$ 0.305                         | 0.0039               | 0.0047                     |
|                     |                                              | Carboplatin                         | day 7                           | 0.279 $\pm$ 0.046 vs. 0.610 $\pm$ 0.287                         | 0.0134               | 0.0363                     |
|                     |                                              | Saline                              | day 11                          | 0.269 $\pm$ 0.067 vs. 0.844 $\pm$ 0.322                         | 0.0015               | <0.0001                    |
| SCLC (DMS 53)       | SG (250 $\mu$ g) <i>plus</i> Carboplatin vs. | SG                                  | day 46                          | 0.282 $\pm$ 0.153 vs. 0.745 $\pm$ 0.162                         | <0.0001              | 0.0001                     |
|                     |                                              | Carboplatin                         | day 14                          | 0.166 $\pm$ 0.019 vs. 0.602 $\pm$ 0.224                         | 0.0004               | 0.0017                     |
|                     |                                              | Saline                              | day 14                          | 0.166 $\pm$ 0.019 vs. 0.683 $\pm$ 0.185                         | <0.0001              | 0.0001                     |
| UBC (5637)          | SG (250 $\mu$ g) <i>plus</i> Cisplatin vs.   | SG                                  | day 76                          | 0.239 $\pm$ 0.188 vs. 0.569 $\pm$ 0.482                         | 0.0671               | 0.0362                     |
|                     |                                              | Control ADC                         | day 17                          | 0.262 $\pm$ 0.141 vs. 0.645 $\pm$ 0.213                         | 0.0002               | 0.0014                     |
|                     |                                              | Cisplatin                           | day 23                          | 0.210 $\pm$ 0.094 vs. 0.812 $\pm$ 0.263                         | <0.0001              | 0.0030                     |
|                     |                                              | Control ADC <i>plus</i> Cisplatin   | day 27                          | 0.221 $\pm$ 0.072 vs. 0.542 $\pm$ 0.315                         | 0.0081               | 0.0007                     |
|                     |                                              | Saline                              | day 17                          | 0.262 $\pm$ 0.141 vs. 0.700 $\pm$ 0.162                         | <0.0001              | <0.0001                    |
| SCLC (DMS 53)       | SG (250 $\mu$ g) <i>plus</i> Cisplatin vs.   | SG                                  | day 46                          | 0.112 $\pm$ 0.026 vs. 0.745 $\pm$ 0.162                         | <0.0001              | <0.0001                    |
|                     |                                              | Cisplatin                           | day 46                          | 0.112 $\pm$ 0.026 vs. 0.758 $\pm$ 0.224                         | <0.0001              | <0.0001                    |
|                     |                                              | Saline                              | day 14                          | 0.156 $\pm$ 0.036 vs. 0.683 $\pm$ 0.185                         | <0.0001              | <0.0001                    |

<sup>a</sup>Time of comparison for AUC was from the day therapy was initiated up to the day the first animal in the control treatment group was lost due to disease progression as described in Materials and Methods. This is also the time when direct comparisons of final tumor volumes were made. <sup>b</sup>Mean tumor volumes for SG combination therapy group *versus* the various control groups on the last day mice were evaluable (i.e., the day post-therapy the first animal in that control group was lost). <sup>c</sup>Comparison of mean tumor volumes on the last day they were evaluable. <sup>d</sup>Overall tumor growth curve AUC comparison.
